# Supplementary material for: Administration frequency as well as dosage of PTH are associated with development of cortical porosity in ovariectomized rats
Source: PubMed Central journal article supplement (PMC5405404; doi:10.1038/boneres.2017.2), 2017-04-25

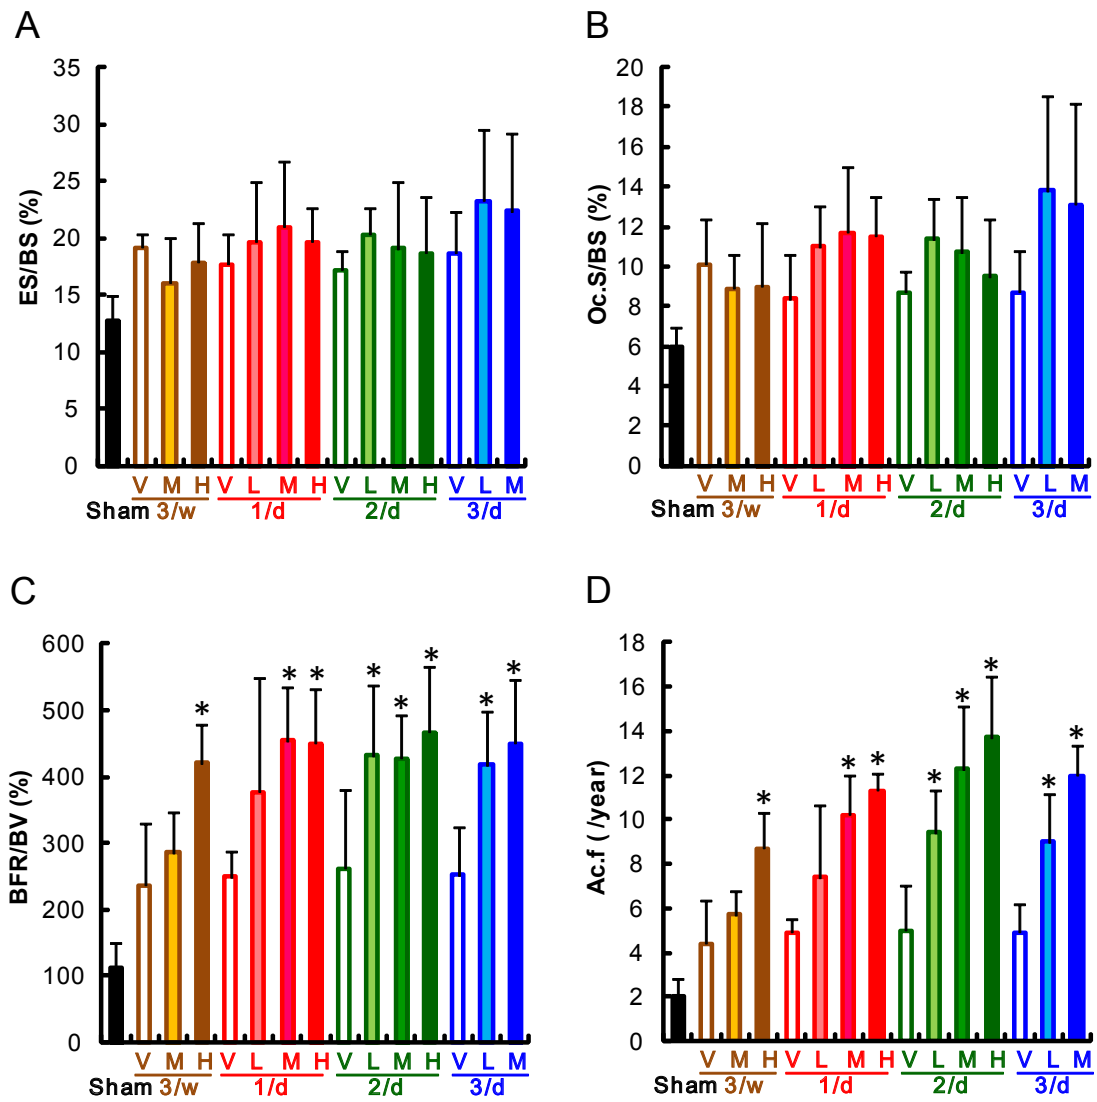

Supplement: boneres20172-s2.pdf [file boneres20172-s2.pdf]
